# Supplementary material
Source: PubMed Central journal article supplement (PMC3080118)
Supplement: NIHMS262000-supplement-Supp1.pdf [file NIHMS262000-supplement-Supp1.pdf]

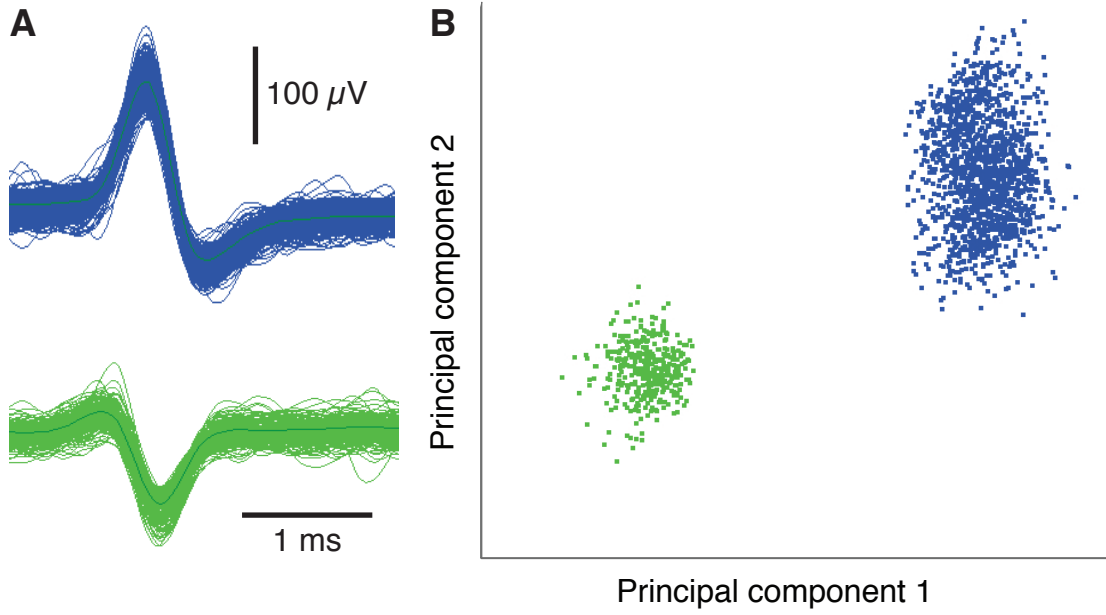

**Supplementary figure 1.** Example of clustering using an algorithm based on principal component analysis and K-means. The depicted case had two distinguishable units.

Duvarci, Popa, Pare Fig. S2

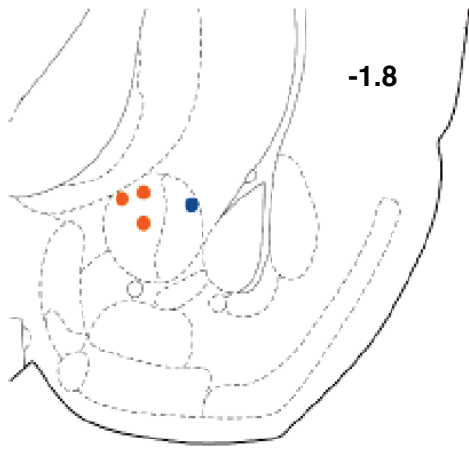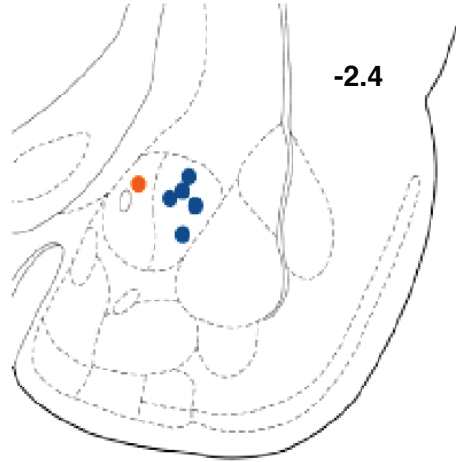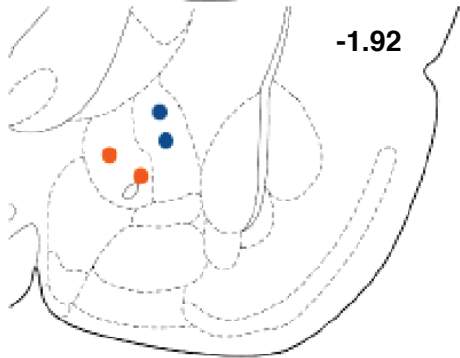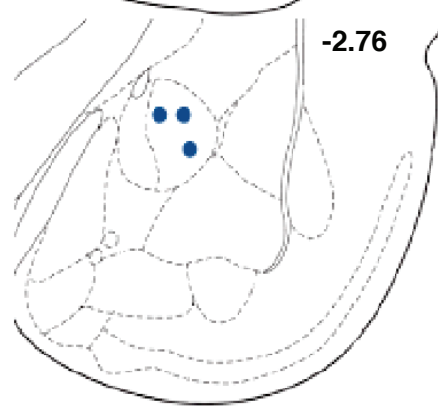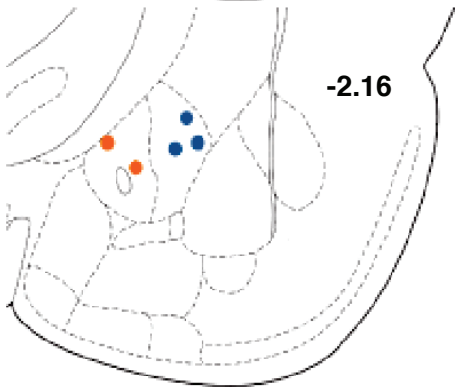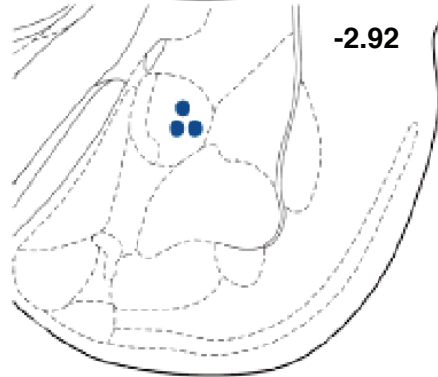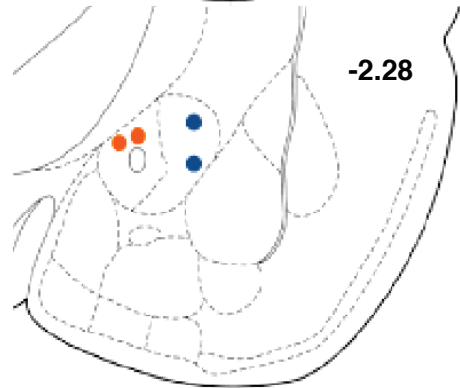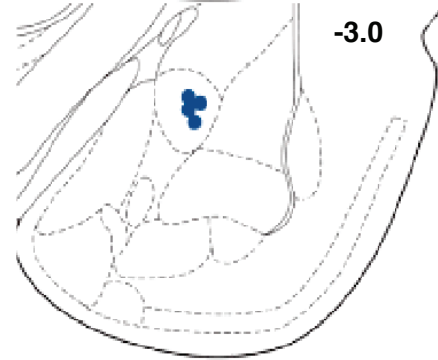

**Supplementary figure 2.** Drawings of eight coronal sections from the anterior (top left) to the posterior (bottom right) poles of the amygdala with colored symbols showing where CeM (orange) and CeL (blue) neurons were recorded. The numbers on the right of each drawing indicate the approximate anteroposterior level of the section relative to bregma.
